# Supplementary material for: Genome-Wide Association Study of the Modified Stumvoll Insulin Sensitivity Index Identifies BCL2 and FAM19A2 as Novel Insulin Sensitivity Loci
Source: Oxford University Press journal article supplement (doi:10.2337/db16-0199), 2016-07-14
Supplement: db160199supplementarydata2.xlsx [file db160199supplementarydata2.xlsx]

## Sheet: Supplemental Table 1
Supplementary Table 1: Detailed cohort information
COHORT	FHS	Sorbs	FUSION	CHS	LURIC	ULSAM	METSIM	EUGENE2	Amish Studies	RISC	Tuebingen	Inter99	Segovia	Pizarra	Botnia Study	Ely Study	1936 Birth Cohort
Discovery or Replication Effort		Discovery	Discovery	Discovery	Discovery	Discovery	Discovery	Replication	Replication	Replication	Replication	Replication	Replication	Replication	Replication	Replication	Replication
Ethnicity	White	Sorbs (Slavonic origin)	European descent	White	White	Northern European (white, Caucasian)	European descent	White Europeans	European descent	White Europeans	White Europeans	Europeans	White Europeans	White Europeans	White Europeans	White	Europeans
Country	USA	Germany	Finland	USA	Germany	Sweden	Finland	Finland, Sweden, Denmark, Germany	USA	Austria, Denmark, Finland, France, Germany, Greece, The Netherlands, Ireland, Italy, Sweden, Spain, Switzerland, United Kingdom, Serbia, Montenegro	Germany	Denmark	Spain	Spain	Finland	UK	Denmark
Collection Type	Population-based	Population-based	Case-control	Population-based	Case-control	Population-based	Population-based	Population-based	Family-based	Population-based	At-risk population (family history, glucose intolerance, overweight, prior gestational diabetes)	Population-based	Population based	Population based	At-risk population (family history of T2D)	Population based	population-based
GLUCOSE MEASUREMENTS
Glucose Sample	Fasting plasma	75g OGTT (fasting, 30 min, 120 min), serum	Fasting plasma	Fasting plasma	Fasting plasma	Fasting plasma	Fasting plasma	Fasting plasma	Fasting fresh venous plasma with sodium floride and potassium oxolate	Serum, 0, 30, 60, 90, 120 min OGTT	Plasma, 0, 30, 60, 90, 120 min OGTT	Plasma; 0, 30, 120 min OGTT	Plasma, 0, 120 min OGTT	Plasma, 0, 120 min OGTT	Plasma, 0, 30, 60, 120 min OGTT	Fasting fresh venous plasma with fluoride	Plasma; 0, 30, 120 min OGTT
Glucose Collection method	Venipuncture	Overnight fast, spinning within 1 hour after collection, then immediate quick-freeze on dry ice before transport, further storage in -80°C freezer	Overnight fast and plasma collected in EDTA tubes	Venipuncture	Venipuncture	Venipuncture	Venipuncture	Venipuncture	Fasting venous blood collected into sodium floride tubes, plasma frozen and stored at -80oC and thawed immediately before glucose measurement.	Venipuncture	Venipuncture	Venipuncture	Venipuncture	Venipuncture	Venipuncture	Overnight fasting and Plasma centrifuged and analyzed immediately	Venipuncture
Glucose Assay	Hexokinase	Hexokinase method (Automated analyser Modular, Roche Diagnostics, Mannheim, Germany)	Glucose oxidase method (Yellow Springs instruments, Yellow Springs, OH and autoanalyser) and hexokinase method	Kodak Ektachem 700 analyzer with reagents (Eastman Kodak, Rochester, NY)	Hexokinase	Glucose dehydrogenase method (Gluc-DH, Merck, Darmstadt, Germany)	Enzymatic photometric test, Glucose hexokinase.	Glucose oxidase method (Glucose & Lactate Analyzer 2300 Stat Plus, Yellow Springs Instrument Co., Inc, Ohio)	YSI glucose analyzer, Yellow Springs, OH	Glucose oxidase method (Cobas Integra, Roche)	YSI 2300 STAT Plus Glucose Analyzer (glucose oxidase method, Yellow Springs Instruments, OH/USA)	Glucose oxidase method	Plasma glucose was estimated in duplicate by a glucose-oxidase method adapted to analyser	Colorimetric glucose-deshidrogenase method	Glucose oxidase method (Beckman Glucose Analyzer, Beckman Instruments, Fullerton, CA)	Hexokinase	Glucose oxidase method
INSULIN MEASUREMENTS
Insulin Sample	Fasting and 120 min plasma	75g OGTT (fasting, 30 min, 120 min), serum	Fasting plasma	fasting and 120 min plasma	Fasting, 60 min and 120 min plasma	Fasting plasma, 120 min plasma	Fasting plasma	Serum, 0, 30, 60, 90, 120 min	Fasting venous plasma with heparin	Serum, 0, 30, 60, 90, 120 min OGTT	Serum, 0, 30, 60, 90, 120 min OGTT	Serum; 0, 30, 120 min OGTT	Serum, 0, 120 min OGTT	Serum, 0, 120 min OGTT	Serum 0, 30, 60, 120 min OGTT	Fasting venous plasma with heparin	Serum 0, 30, 120 min OGTT
Insulin Collection method	Venipuncture	Overnight fast, spinning within 1 hour after collection, then immediate quick-freeze on dry ice before transport, further storage in -80°C freezer	Overnight fast and plasma collected in EDTA tubes	Venipuncture	Venipuncture	Venipuncture	Venipuncture	Venipuncture	Fasting venous blood collected into sodium heparin tubes, centrifuged at 4oC within 1 hour, plasma frozen and stored at -80oC and thawed immediately before insulin measurement.	Venipuncture	Venipuncture	Venipuncture	Venipuncture	Venipuncture	Venipuncture	Overnight fasting and Fasting venous blood was immediatelly centrifuged and plasma frozen at -80C until measurement	Venipuncture
Insulin Assay	DPC Coat-a-Count Total IRI	AutoDELFIA Insulin assay (PerkinElmer Life and Analytical Sciences, Turku, Finland)	RIA with dextran charcoal separation	competitive radioimmunoassy (Diagnostic Products Corp., Malver, PA)	AIA pack IRI / AIA1200	Immunoreactive insulin: Enzymatic-immunological assay (Enzymun, Boehringer Mannheim)	Immunoassay, luminometric measurement	Microparticle enzyme immunoassay (Abbott Laboratories, Tokyo, Japan)	Millipore 125 Iodine Human Insulin RA kit	Insulin, proinsulin and C-peptide were measured by a two-sited, time-resolved fluoroimmunoassay (AutoDELFIA Insulin kit, Wallac Oy, Turku, Finland) using monoclonal antibodies	Insulin immunochemiluminometric assay (Advia Centaur XP, Siemens, Germany)	AutoDELFIA insulin kit	Human Insulin Specific RIA kit, Linco Research Inc., St Louis MO, USA)	RIA, Coat-a-count Insulin, DPC	Radioimmunoassay (Pharmacia, Uppsala, Sweden), enzyme linked immunoassay (DAKO Diagnostics Ltd, Cambridgeshire, UK), and fluoroimmunometric assay (AutoDelfia, Perkin Elmer Finland, Turku, Finland)	Immunometric assay	ELISA
Insulin Assay sensitivity	> 8 pmol/L	3.0 pmol / L	CV=11% low conc, 13% high conc	5 - 400 mIU/L			3.0 pmol / L		2-200 mU / L		3 pmol/l		with a lower detection limit of 2μU/ml.	3.6microU/mL	Pharmacia: CV=5%; DAKO: CV=7.5%	Maximum intra-assay CV of 6.6%
SAMPLES															SAMPLES
EXCLUSIONS	Type 1 diabetes, type 2 diabetes	Known diabetes, FG ≥ 7 mmol/l, 120min glucose ≥ 11.1 mmol/l	Diabetes ascertained by OGTT, medical record review or GAD Ab positivity; diabetes medication, missing phenotype or covariate	Use of diabetes medications or fasting glucose >= 7mmols	History of diabetes, OGTT, fasting glucose > 7mmol	Use of diabetes medication, fasting plasma glucose >= 7 mmol/L	Diabetes ascertained by OGTT, medical record review or GAD Ab positivity; diabetes medication, missing phenotype or covariate	Diabetes ascertained by OGTT, medical record review	Diabetes (either self-reported or registered as using anti-diabetic drugs), FG >= 7 mmol/l,	Lipid disorders or diabetes, lipid medications, pregnancy	Diabetes ascertained by OGTT, medical record review or GAD Ab positivity; diabetes medication	Self-reported diabetes, treated with anti-diabetic drugs or diabetes at OGTT	Diabetes ascertained by OGTT, medical record review	Previous diabetes with insulin or antidiabetic drugs treatment and subjects diagnosed during the OGTT, and/or FPG ≥7 mmol/L. Institutionalized person, pregnant women, and those persons with a severe clinical problem or psychological disorder.	Fasting glucose ≥7.0 mmol/l or 2h glucose ≥11.1 mmol/l, known T2D or GAD Ab positivity, missing phenotype or covariate	Known diabetes, fasting plasma glucose ≥ 7 mmol/l	Self-reported diabetes, treated with anti-diabetic drugs or diabetes at OGTT
Samples with STUMVOLL phenotype (uniform analysis): N all (%males/%females)	2602 (45.77%/54.23%)	802 (40.3%/59.7%)	462 (37% / 63%)	2761 (38.2 / 61.8)	962 (76.3%/23.7%)	962 (100% males)	7388 (100% / 0%)	885 (44.3%, 55.7%)	334 (39%.61%)	921 (44.1%,55.9%)	2470 (35.1% / 64.9%)	5318 (49/51)	420 (46.8%/53.2%)	640 (34.1%/65.9%)	1235 (47.9% / 52.1%)	1442 (46.4 / 53.6)	576 (45.7%/54.3%)
STUMVOLL [Mean (sd)], units			0.0865288 (0.02316)	0.037981		0.074 (0.031)	0.0928042 (0.0295312)	0.0914756 (0.0275914)	0.09 ± 0.02	0.106 (0.018)	0.070 (0.049)	0.101 (0.021)	0.0873 (0.02549)	0.10066 ( 0.023)	0.0988 (0.0204)	0.0875 (0.0311)	0.098 (0.022)
Age [Mean (sd) males / Mean (sd) females], years	53.94 (9.90)/54.06 (9.82)	47.6(16.7)/48.1(16.1)	69.05(5.36) / 65.10 (6.96)	72.9 (5.6) / 71.9 (5.1)	61.24 (9.90) / 64.03 (9.80)	71.0 (0.6) / NA	57.04(6.96) / NA	39.06 (9.27) / 39.72 (9.11)	45.3 (13.6)/ 44.8 (12.1)	43.31 (8.56)/ 44.46 (8.19)	41.5 (14.4) / 39.6 (12.6)	46.1 (7.8)/45.6 (7.8)	51.74(11.50)/52.41(11.39)	44.2 (13.5) / 43.3 (12.8)	57.6 (10.5) / 59.0 (10.0)	61.3(9.2) / 60.8(9.1)	60.6 (0.41)/60.5 (0.48)
BMI [Mean (sd) males / Mean (sd) females], kg/m2	27.79 (3.86)/26.05 (4.90)	27.1(3.95)/26.7(5.51)	27.24 (4.12) / 27.84 (4.23)	26.1 (3.4) / 26.0 (4.8)	27.21 (3.57) / 26.77 (4.51)	26.0 (3.2) / NA	26.84 (3.81) / NA	27.00 (4.37) / 26.07 (5.08)	26.3 (3.5) / 28 (5.2)	26.36 (3.54)/24.78 (4.22)	30.2 (9.0) / 31.4 (9.9)	26.6 (3.9)/25.6 (4.8)	27.0(3.50)/26.4(4.08)	28.1 (4.2) / 27.7 (5.2)	27.0 (3.38) / 27.1 (4.34)	27.3(3.9) / 27.2(5.4)	27.0 (3.5)/26.1 (4.3)
Fasting PLASMA glucose [Mean (sd) males / Mean (sd) females], mmol/l	5.3542 (0.4639)/5.1228 (0.5027)	5.46(1.10)/5.59(1.20)	5.12 (0.49) / 5.02 (0.44)	5.6 (0.5) / 5.5 (0.5)	5.50 (0.58) / 5.34 (0.56)	5.38 (0.56) /NA	5.71 (0.48) /NA	5.29 (0.52) / 4.98 (0.44)	5 (0.4) / 4.9 (0.5)	5.20 (0.52) / 4.92 (0.56)	5.24 (0.55) / 5.12 (0.55)	5.61 (0.49)/5.3 (0.49)	4.66(0.49)/4.41(0.58)	5.5 (0.7) / 5.3 (0.7)	5.5 (0.53) / 5.4 (0.47)	5.13(0.55) / 4.89(0.55)	5.33 (0.52)/5.13 (0.48)
Original units for fasting glucose	mg/dl	mmol/l	mg/dl	mg/dl	mg/dl	mmol/L	mmol/l	mmol/l	mg/dl	mmol/l	mmol/l	mmol/L	mg/dl	mg/dL	mmol/l	mmol/l	mmol/L
Conversion factor for glucose to mmol/l	1/18.01	-	0.05551	2016-01-18	2016-01-18	No		None	0.0555	NA	None	NA	0.05551	0.05551	None	NA	NA
Fasting insulin [Mean (sd) males / Mean (sd) females], pmol/l	30.186 (10.925)/27.230 (8.739)	40.51(24.89)/41.01(28.02)	66.57 (33.82) / 69.62 (37.25)	94.7 (45.8) / 92.5 (49.0)	62.61 (52.41) / 57.68 (40.73)	72.97 (40.10) / NA	49.76 (35.29) / NA	51.95 (37.87) / 46.70 (32.22)	60.9 (22.9) / 64.9 (27.7)	36.80 (19.96)/ 32.5 (17.42)	82.3 (76.2) / 83.9 (69.9)	43.1 (27.8)/39.1 (24.7)	12.03(6.29)/11.72(6.91)	49.5 (36.7) / 44.9 (32.8)	46.9 (31.3) / 42.7 (26.0)	60.4(36.7) / 54.3(34.6)	45.4 (28.6)/40.0 (18.2)
Original units for fasting insulin	pmol/l	pmol/l	mU/l	mIU/L	IU/ml	mU/L	mU/l	pmol/l	microU/ml	pmol/l	pmol/l	pmol/L	μU/ml	μU/ml	mIU/L	pmol/l	pmol/L
Conversion factor for insulin to pmol/l	1	Not applicable	6	6.945	6	6	6	Not applicable	6	Not applicable	Not applicable	Not applicable	6	6	6.945	Not applicable	Not applicable
GENOTYPING
Genotyping platform & SNP panel	Affymetrix 500K and MIPS 50K	500K Affymetrix GeneChip (250K Sty and 250K Nsp arrays, Affymetrix, Inc) and Affymetrix Genome-Wide Human SNP Array 6.0	Illumina HumanHap300	Illumina HumanCNV370-Duo BeadChip	Affymetrix 6.0	Illumina Omni2.5+Metabochip	Illumina HumanOmniExpress-12v1	Infinium HumanHap 550 k version 3 chips	illumina OmniChip 2.5M, Affy 500K, Affy6.0, Metabochip	Applied Biosystems	Sequenom MassArray	KASP Genotyping	Sequenom MassArray	TaqMan® Open Array® Genotyping System (Applied Biosystems)	Affymetrix 500K, some also Illumina HumanOmni2.5-4v1_B	Sequenom	Illumina CoreExome/Illumina HiScan
Genotyping centre	Affymetrix	Microarray Core Facility of the Interdisciplinary Centre for Clinical Research, University of Leipzig, Germany and ATLAS Biolabs GmbH, Berlin, Germany	Center for Inherited Disease Research	General Clinical Research Center's Phenotyping/Genotyping Laboratory at Cedars-Sinai	LURIC Study nonprofit LLC, c/o Synlab MVZ Heidelberg, Wasserturmstrasse 71, D-69214 Eppelheim	SNP&SEQ Technology Platform, Uppsala	Center for Inherited Disease Research	The Finnish Genome Centre, Helsinki, Finland	Univ of Maryland Division of Endocrinology	Kbioscience	Central Laboratory of the University Hospital Tuebingen	LGC Genomics	CEGEN	Sequencing and Genotyping Platform. Hospital Carlos Haya	Broad Institute	MRC-Epid	The Novo Nordisk Foundation Center for Basic Metabolic Research, University of Copenhagen
Genotyping calling algorithm	BRLMM	BRLMM algorithm (Affymetrix, Inc) for 500K and Birdseed Algorithm for Genome-Wide Human SNP Array 6.0	Beadstudio	Illumina BeadStudio software	Birdseed v2	GenomeStudio 2010.3	GenomeStudio version 2011.1	Sequenom MassARRAY Typer (version 3)	GeneCall, BRLLM	ABI Prism 7000 sequence detection system	iPLEX software	KlusterCaller	iPLEX software	TaqMan Genotyper Software	BRLMM for 500K and Illumina GenomeStudio v2010.3		Illumina GenCall
SAMPLE QC
Call rate [filter detail]	0.97	> 94%	>97.5%	>95%	>95%	≥ 95%	>98% / 0	0.999	>95%	>90%	>95%	NA	>95%	>90%	0.95	>95%	0.95
Heterozygosity [filter detail / N individuals excluded]	5 SD from mean (< 25.758% or > 29.958%) / 10	None	None	None	None	> 3 s.d.	None	None	None	None	None	NA	None	None	None	None	Rare alleles (MAF<0.05): -0.4<F<0.4, common alleles (MAF>0.05): -0.03<F<0.03 (16 excluded)
Ethnic outliers excluded	None	Ethnic outliers	None	African American excluded	None	MDS analysis performed	non-Finnish, PCA outliers, gender discordance	None	None	None	None	None	None	None	None	None	None
Other exclusions	None	duplicates; gender mismatch; known diabetes, FG ≥ 7 mmol/l, 120min glucose ≥ 11 mmol/l	None	1908 persons were excluded from genotyping if they had prevalent cardiovascular disease. Other samples were excluded for sex mismatch and discordance with prior genotyping.	duplicates, sex ambiguity	Related individuals, missing phenotype values	unexpected duplicates, contamination > 3%, missing phenotype, diabetics	None	mendelian errors	None	None	None	None	None	Genetic fingerprint, gender check	None	None
Individuals for analysis	2602	802	462	3291 available (2761 with phenotype and no DM)	962	962	7388	885	2872	921	2470	5318	420	640	1068 with Affy 500K, 1235 when complemented with Omni2.5	1616	656
SNP QC (prior to imputation)
MAF [filter detail / N SNPs excluded]	> 1% / 68,953	0.01	>1%	none	> 1%	≥1%	none	None	>1%	>5%/0	MAF of replicated SNPs >0.45% / 0	NA	>1%/0	>1%/0	Monomorphic	None	No filter
HWE	> 10-6	> 10-6	> 10-6	P > 10-5	> 10-6	> 10-6	> 10-6	>0.004	1e-06	0.000001/0	>9.4*10-8	0.001/0	>10-2 / 0	>10-2 / 0	>10-6	None	> 10-6
Call rate	≥95%	0.95	≥ 90%	<97%	≥95%	≥99% (MAF<5%) or ≥95% (MAF≥5%)	0.95	>95%	>95%	>95%	>95%	95%/0	>95%	>90%	95% (Affymetrix) / 98% (Illumina)	>98%	0.95
Other	None	None	NMI or duplicate pair discrepancies <= 3	<=2 duplicate errors or Mendelian inconsistencies (for reference CEPH trios), heterozygote frequency = 0, SNP not found in HapMap.	None	None	triallelicmap_score<30 / 5314	None	None	None	None	None	None	None	None	None	None
SNP number in QC'd dataset	378163	378513	306791	306655	750437	1587454	681789	12	1944974	13	23	20	21	19	9	23	528515
IMPUTATION STATS															IMPUTATION STATS
Imputation software	MACH	IMPUTE to HapMap2 reference panel	MACH 1 to HapMap release 21 CEU (phase I+II) reference panel	BIMBAM v0.99 with reference to HapMap CEU using release 22, build 36	MACH with reference to HapMap CEU Panel 2	IMPUTE2	MACH to 1000 Genomes phase 1 integrated variant release (v3) reference panel	Not applicable	IMPUTE v2 using 1000 Genomes Phase 3 reference panel	MACH2QTL using 1000 Genomes reference panel	Not applicable	Not applicable	Not applicable	Not applicable	IMPUTE2 using 1000 Genomes Phase 3 reference panel	Not applicable	IMPUTE2 using 1000 Genomes reference panel
Imputation quality metrics	r2hat ≥ 0.3	Proper-info > 0.4	r2hat>0.3	observed/expected variance ratio < 0.01	r2>0.3 and prob>0.9	info>0.4	r2hat>0.3	Not applicable	No filtering done post-imputation	Not applicable	Not applicable	Not applicable	Not applicable	Not applicable	INFO > 0.4	Not applicable	inputeExtract.INFO
Other SNP QC filters applied?	MAF ≥ 1%	MAF>1%, HWE<10-4	MAF ≥ 1%	dosage variance <0.01		MAF≥1%	MAF ≥ 1%	Not applicable	No filtering done post-imputation	MAF >= 1% r2_hat >= 0.3	Not applicable	Not applicable	Not applicable	Not applicable	Not applicable	Not applicable	Not applicable
DATA ANALYSIS															DATA ANALYSIS
Number of SNPs in analysis N imputed	2436797	2531712	2476731	2257780	1800000	3178687	9097160	12 (genotyped)	22	24 (13 genotyped, 11 imputed)	23 (none imputed)	20	21(none imputed)	19 (none imputed)	47 (9 genotyped, 38 imputed)	23	14
Adjustments	sex, age, agesq, PC1-8	sex,age,bmi	sex, age	age, sex, study site	sex, age, age2	Age, PC1, PC2	Age, agesq, 3 PCs	Age, sex, center, family	Age, age2, sex	Age, sex, centre, the first two principal components	Age and sex	age, sex	age and sex	age and sex	age, sex, centre; individuals clustered in families	age sex, with/without BMI	age, sex
Analysis method	Linear mixed effect models, generalized estimating equations (interaction)	linear regression	Linear regression	linear regression	linear regression	Linear regression	Linear regression	Mixed linear model	Mixed model	Linear regression	Linear regression	Linear mixed effect models, generalized estimating equations (interaction)	linear regression	linear regression	Linear regression	linear regression	Linear mixed effect models, generalized estimating equations (interaction)
Software for analysis	LMEKIN, GEE (R package)	SNPTEST/QUICKTEST	ProbABEL	R	PLINK, QUICKTEST	SNPTEST v2.4.1/ Quicktest v0.95	ProbABEL	SPSS v.17	MMAP	STATA 10.1	JMP 10.0.0	R	SPSS 15.0	R and SPSS 17.0	STATA 13.1	Stata v13.0	R
REFERENCES															REFERENCES
Reference cohort		PMID:21559053	16	PMID: 1669507		PMID: 16030278	PMID: 19223598	Laakso M. et al.; Diabetologia 2008;51:502-11	18440328, 18805900			Jørgensen, T. et al. A randomized non-pharmacological intervention study for prevention of ischaemic heart disease: Baseline results Inter99 (1). Eur J Cardiovasc Prev Rehab 10, 377-386 (2003)	Martinez-Larrad MT et al. Med Clin (Barc). 2005;125(13):481-6	Soriguer F, Rojo-Martínez G, Almaraz MC, Esteva I, Ruiz de Adana MS, Morcillo S, Valdés S, García-Fuentes E, García-Escobar E, Cardona I, Gomez-Zumaquero JM, Olveira-Fuster G. Incidence of type 2 diabetes in southern Spain (Pizarra Study). Eur J Clin Invest. 2008 Feb;38(2):126-33. PubMed PMID: 18226046	PMID: 8866565	PMID: 17257284	PMID: 11251676
Reference GWAS		PMID:19729412		PMID: 20031568		NA					Böhm A. et al.; PLoS One 2012;7(3):e34035				PMID: 17463246
Website	http://www.ncbi.nlm.nih.gov/projects/gap/cgi-bin/study.cgi?study_id=phs000007.v2.p1	-	http://fusion.sph.umich.edu	http://www.chs-nhlbi.org/		http://www2.pubcare.uu.se/ULSAM/			http://medschool.umaryland.edu/endocrinology/amish.asp			www.inter99.dk			http://www.botnia-study.org, https://www.broadinstitute.org/diabetes	http://www.mrc-epid.cam.ac.uk/research/studies/ely/
