# Supplementary material for: Genome-Wide Association Study of the Modified Stumvoll Insulin Sensitivity Index Identifies BCL2 and FAM19A2 as Novel Insulin Sensitivity Loci
Source: Oxford University Press journal article supplement (doi:10.2337/db16-0199), 2016-07-14
Supplement: db160199supplementarydata3.xlsx [file db160199supplementarydata3.xlsx]

## Sheet: Supplemental Table 2
Supplementary Table 2. Association of known fasting insulin loci with fasting insulin and ISI in discovery cohorts
			Published Reports for FI (without BMI adjustment)				ISI Full Discovery Cohort (without BMI adjustment)				FI in FHS, Sorbs, FUSION, CHS (without BMI adjustment)				ISI in FHS, Sorbs, FUSION, CHS (without BMI adjustment)
SNP	Locus	Eff Allele	Effect	SE	P-value	N	Effect	SE	P-value	N	Effect	SE	P-value	N	Effect	SE	P-value	N
rs1421085	FTO	C	0.02	0.003	1.9 × 10−15	104062	-0.018	0.11	0.12	16753	0.0162	0.0068	0.01743	8991	-0.0182	0.0184	0.3213	6627
rs983309	PPP1R3B	T	0.029	0.004	3.8 × 10−14	103030	0.009	0.02	0.55	16753	0.0215	0.0106	0.04362	9584	0.0123	0.0272	0.6529	6627
rs9884482	TET2	C	0.017	0.002	1.4 × 10−11	108420	-0.004	0.01	0.75	16752	0.0034	0.0068	0.6143	9223	-0.0376	0.0182	0.03899	6525
rs7903146	TCF7L2	C	0.018	0.003	6.1 × 10−11	103037	-0.016	0.01	0.23	16753	0.0084	0.0072	0.2415	9584	0.0144	0.019	0.4495	6627
rs10195252	GRB14	T	0.016	0.003	4.9 × 10−10	99126	-0.008	0.02	0.49	16752	0.0119	0.0067	0.07412	9584	-0.012	0.0177	0.4962	6627
rs1167800	HIP1	A	0.016	0.003	2.6 × 10−9	91416	-0.034	0.0216	0.004	16752	0.0256	0.0086	0.003028	8810	-0.0432	0.0216	0.045	5825
rs2820436	LYPLAL1	C	0.015	0.003	4.4 × 10−9	104044	-0.028	0.01	0.017	16753	0.017	0.0071	0.01643	9312	-0.0148	0.0189	0.4353	6627
rs2745353	RSPO3	T	0.014	0.002	5.5 × 10−9	104075	-0.014	0.01	0.22	16753	0.0044	0.0066	0.5114	9220	0.0205	0.0178	0.2491	6627
rs731839	PEPD	G	0.015	0.003	1.7 × 10−8	104636	-0.011	0.0192	0.37	13991	0.0105	0.0071	0.1411	9239	-0.0097	0.0192	0.6131	6627
rs4865796	ARL15	A	0.015	0.003	2.1 × 10−8	100001	-0.035	0.01	0.003	16753	0.0064	0.0072	0.3704	9290	-0.0336	0.0189	0.07533	6627
rs2972143	IRS1	G	0.014	0.003	3.2 × 10−8	99566	-0.042	0.01	2.00×10-4	16753	0.0115	0.0067	0.08754	9584	-0.0349	0.0175	0.04544	6627
rs1530559	YSK4	A	0.015	0.003	3.4 × 10−8	107281	-0.013	0.01	0.3	16753	0.0177	0.0074	0.01642	8906	-0.0091	0.0218	0.6751	6627
rs2943645	IRS1	T	0.019	0.002	2.3 × 10−19	99023	-0.042	0.01	2.00×10-4	16753	0.0107	0.0067	0.1127	9584	-0.0362	0.0175	0.03869	6627
			Published Reports for FI (with BMI adjustment)				ISI Full Discovery Cohort (with BMI adjustment)				FI in FHS, Sorbs, FUSION (with BMI adjustment)				ISI in FHS, Sorbs, FUSION (with BMI adjustment)
SNP	Locus	Eff Allele	Effect	SE	P-value	N	Effect	SE	P-value	N	Effect	SE	P-value	N	Effect	SE	P-value	N
rs10195252	GRB14	T	0.017	0.002	1.3 × 10−16	98997	-0.028	0.01	0.007	16734	0.0157	0.0064	0.01427	7851	-0.0154	0.0216	0.4748	3858
rs2126259	PPP1R3B	T	0.024	0.003	3.3 × 10−13	99021	0.033	0.02	0.02	16735	0.0125	0.0105	0.2354	7851	0.0207	0.0347	0.5495	3858
rs4865796	ARL15	A	0.015	0.002	2.2 × 10−12	98314	-0.042	0.01	1.00×10-4	16735	0.0119	0.0067	0.07562	7851	-0.045	0.0219	0.03959	3858
rs17036328	PPARG	T	0.021	0.003	3.6 × 10−12	98984	-0.068	0.01	1.00×10-6	16725	0.0273	0.0092	0.003098	7807	-0.0854	0.0301	0.004529	3848
rs731839	PEPD	G	0.015	0.002	5.1 × 10−12	103252	-0.018	0.01	0.09	13980	0.0187	0.0067	0.005239	7851	-0.0273	0.0225	0.225	3858
rs974801	TET2	G	0.014	0.002	3.3 × 10−11	103489	-0.012	0.01	0.23	16735	-0.0029	0.0065	0.6508	7851	-0.0302	0.0218	0.1668	3858
rs459193	ANKRD55-MAP3K1	G	0.015	0.002	1.1 × 10−10	103378	-0.039	0.01	3.00×10-4	16734	0.0282	0.007	5.92×10-5	7851	-0.0558	0.0236	0.018	3858
rs6822892	PDGFC	A	0.014	0.002	2.6 × 10−10	103432	-0.044	0.01	7.00×10-5	16735	0.0206	0.0067	0.002229	7851	-0.0582	0.0222	0.008811	3858
rs4846565	LYPLAL1	G	0.013	0.002	1.8 × 10−9	99014	-0.003	0.01	0.79	16735	0.0207	0.0066	0.001658	7850	-0.0239	0.0218	0.272	3858
rs3822072	FAM13A	A	0.012	0.002	1.8 × 10−8	99977	-0.003	0.01	0.81	16735	0.0043	0.0063	0.4898	7851	0.0249	0.0207	0.2293	3858
rs6912327	UHRF1BP1	T	0.017	0.003	2.3 × 10−8	80010	-0.023	0.01	0.08	16734	0.019	0.0077	0.0131	7851	-0.0337	0.0258	0.1925	3858
rs13081389	PPARG	A	0.025	0.013	1.6 × 10-6	52379	-0.079	0.02	3.00×10-5	16735	0.0399	0.013	0.002195	7851	-0.1023	0.0426	0.01628	3858
rs7578326	IRS1	A	0.019	0.003	2.7 × 10-11	52379	-0.061	0.01	6.80×10-9	16735	0.0219	0.007	0.001642	7851	-0.0295	0.0228	0.197	3858
rs780094	GCKR	C	0.019	0.003	3.4 x 10-12	52379	0.004	0.01	0.7	16725	0.0175	0.0062	0.004646	7836	0.0111	0.0208	0.5934	3848
rs972283	KLF14	G	0.013	0.003	4.4 × 10-6	52379	-0.018	0.01	0.073	16735	0.0084	0.0063	0.1828	7851	-0.0598	0.0208	0.004108	3858
			Published Reports for FI (Model 3)				ISI Full Discovery Cohort (Model 3)				FI in FHS, Sorbs, FUSION (Model 3)				ISI in FHS, Sorbs, FUSION (Model 3)
SNP	Locus	Eff Allele	SNP Effect	SNP SE	P-value	N	SNP Effect	SNP SE	P-value	N	SNP Effect	SNP SE	P-value	N	SNP Effect	SNP SE	P-value	N
			Int Effect	Int SE			Int Effect	Int SE			Int Effect	Int SE			Int Effect	Int SE
rs7607980	COBLL1- GRB14	T	-0.06	0.02	4.3 × 10−20	83116	-0.002416	0.1151	0.002	16685	-0.1235	0.04605	6.18×10-5	10589	0.04038	0.1515	0.01035	6561
			0.003	0.001			-0.001806	0.004494			0.005515	0.001733			-0.004093	0.006004
rs2943634	IRS1	C	0.02	0.02	2.5 × 10−14	82318	0.08392	0.07825	5.15×10-9	16729	-0.02368	0.03434	1.91×10-4	10650	0.1536	0.1063	0.03703	6605
			-0.001	0.001			-0.07825	0.005476			0.001753	0.001297			-0.007219	0.004126
rs4841132	PPP1R3B	A	-0.03	0.03	1.7 × 10−10	82905	0.06299	0.1182	0.13	16735	-0.1292	0.0577	0.02654	10673	0.2609	0.1813	0.07386	6611
			0.002	0.001			0.1182	-0.001438			0.005405	0.002214			-0.008202	0.007032
rs4691380	PDGFC	C	0.004	0.02	5.3 × 10−9	82075	0.07546	0.07824	0.0006	16735	-0.01307	0.03535	0.001836	10673	0.07467	0.1026	0.01249	6611
			-0.02	0.003			-0.07824	0.004321			0.001279	0.001344			-0.004617	0.004001
rs4646949	UHRF1BP1	T	-0.02	0.02	3.7 × 10−8	82572	0.03602	0.08385	0.25	16726	-0.048	0.03541	6.15×10-5	10645	0.063	0.1093	0.07221	6602
			0.01	0.003			0.08385	-0.002058			0.00272	0.001352			-0.003929	0.004259
rs2785980	LYPLAL1	T	0.01	0.02	2.0 × 10−8	81598	0.007577	0.08063	0.99	16735	0.02764	0.0337	0.006164	10673	0.03348	0.1067	0.867	6611
			2.00×10-4	0.001			0.08063	-0.0003286			-3.72×10-4	0.001292			-0.001569	0.004184
Association of known fasting insulin (FI) variants were tested for association with fasting insulin and the modified insulin sensitivity index (ISI) in different cohorts and in models without adjustment for body mass index (BMI), with adjustment for BMI, and in Model 3 (test of the combined influence of the genotype effect adjusted for BMI and the interaction effect between the genotype and BMI).…
