# Supplementary material for: Genome-Wide Association Study of the Modified Stumvoll Insulin Sensitivity Index Identifies BCL2 and FAM19A2 as Novel Insulin Sensitivity Loci
Source: Oxford University Press journal article supplement (doi:10.2337/db16-0199), 2016-07-14
Supplement: db160199supplementarydata4.xlsx [file db160199supplementarydata4.xlsx]

## Sheet: Supplemental Table 3
Supplementary Table 3. Results of Discovery, Replication, and Meta-Analysis for Variant Association with Insulin Sensitivity Index
SNP	Locus				Discovery					Replication					Combined Meta-Analysis
Model			Effect (Beta)	SE	P-value	Het P-value	N	Effect (Beta)	SE	P-value	Het P-value	N	Effect (Beta)	SE	P-value	Het P-value	N
rs13422522	NYAP2
	1		-0.045	0.0152	0.00319	0.1624	16752.3	-0.05	0.02	0.003	0.1922	13326	-0.043	0.01	1.64×10-5	0.1361	30078.3
	2		-0.07	0.01	4.29×10-8	0.1503	16735	-0.05	0.01	5.53×10-5	0.5109	13322	-0.0593	0.0087	1.20×10-11	0.2619	30057
	3	SNP	0.13	0.09	1.86×10-7	0.4328	16735	0.07	0.07	3.00×10-4	0.2853	13322	0.09666	0.05674	8.87×10-11	0.2866	30057
		Interaction	-0.007493	0.003456				-0.004422	0.002889				-0.005674	0.002195
rs4078023	GP2
	1		-0.07	0.05	0.14	0.1673	13185	0.07	0.07	0.36	0.4498	11557	-0.0277	0.0403	0.4924	0.1834	24742
	2		-0.09	0.04	0.04	0.1671	13171	0.04	0.06	0.51	0.05657	11556	-0.0457	0.0353	0.195	0.02507	24727
	3	SNP	1.31	0.23	3.41×10-10	0.007664	13171	0.11	0.25	0.79	0.1272	11556	0.7983	0.1663	3.17×10-7	4.23×10-5	24727
		Interaction	-0.05378	0.008831				-0.003264	0.009633				-0.03292	0.006358
rs12372926	ARRDC4
	1		-0.05	0.01	2.27×10-5	0.009537	16753	-0.0004	0.01	0.98	0.2688	13342	-0.0278	0.0085	0.001071	0.002499	30095
	2		-0.05	0.01	2.18×10-7	0.01505	16735	-0.007	0.01	0.54	0.07408	13338	-0.0322	0.0075	1.16×10-5	4.35×10-4	30073
	3	SNP	0.2	0.08	9.71×10-7	0.0637	16735	0.07	0.06	0.57	0.04976	13338	0.1054	0.04811	4.20×10-4	0.0005589	30073
		Interaction	-0.009374	0.003034				-0.002443	0.002412				-0.004902	0.001868
rs16924527	TOX
	1		0.14	0.05	0.009	0.05688	13523	0.1	0.05	0.05	1.48×10-7	11482	0.1187	0.036	0.0009791	2.57×10-7	25005
	2		0.11	0.05	0.02	0.04282	13514	0.04	0.04	0.4	0.2987	11480	0.0738	0.0317	0.0198	0.05023	24994
	3	SNP	-0.8	0.23	7.6×10-10	4.873e-06	13514	0.38	0.17	0.05	8.07×10-6	11480	-0.08207	0.1351	3.72×10-6	2.29×10-15	24994
		Interaction	0.03716	0.008798				-0.01304	0.006569				0.007825	0.005162
rs2828537	MRPL39
	1		-0.07	0.04	0.06	0.5729	16752.9	-0.01	0.04	0.74	0.04883	13001	-0.0395	0.0252	0.1166	0.1221	29753.9
	2		-0.06	0.03	0.06	0.4082	16735	-0.004	0.03	0.9	0.2917	12998	-0.0318	0.0224	0.1569	0.283	29733
	3	SNP	1.08	0.17	1.45×10-10	0.2031	16735	0.02	0.13	0.92	0.2965	12998	0.4182	0.1024	2.60×10-5	3.19×10-4	29733
		Interaction	-0.04334	0.006604				-0.001141	0.004997				-0.01738	0.003935
rs3900087	ADAMTS3
	1		-0.14	0.08	0.1	0.4803	10784	-0.003	0.05	0.96	0.4557	11567	-0.0435	0.0451	0.3343	0.4238	22351
	2		-0.12	0.07	0.09	0.8568	10784	-0.005	0.05	0.91	0.4193	11566	-0.0389	0.038	0.3056	0.5187	22350
	3	SNP	2.29	0.38	9.49×10-10	0.6037	10784	-0.02	0.25	0.79	0.03337	11566	0.737	0.209	4.66×10-4	1.75×10-5	22350
		Interaction	-0.09063	0.01423				-8.87×10-5	0.009836				-0.03016	0.008032
rs6027072	ARHGAP40
	1		0.14	0.03	3.73×10-5	0.9536	16753	0.04	0.04	0.28	0.2078	12143	0.0973	0.0249	9.43×10-5	0.4115	28896
	2		0.12	0.03	4.3×10-5	0.9669	16735	0.02	0.03	0.53	0.09141	12142	0.078	0.022	4.05×10-4	0.1787	28877
	3	SNP	-0.48	0.18	5.7×10-9	0.3721	16735	-0.3	0.16	0.07	0.07901	12142	-0.3888	0.1194	4.36×10-9	0.02424	28877
		Interaction	0.0235	0.00691				0.01273	0.006224				0.0184	0.004557
rs12454712	BCL2
	1		-0.05	0.01	0.0004	0.7263	13190	-0.02	0.01	0.11	0.6153	12783	-0.0356	0.0098	2.80×10-4	0.6402	25973
	2		-0.07	0.01	1.39×10-7	0.6876	13982	-0.03	0.01	0.01	0.2601	12779	-0.0478	0.0085	1.87×10-8	0.2083	26761
	3	SNP	0.12	0.1	5.39×10-7	0.9489	13982	0.02	0.07	0.01	0.05507	12779	0.04353	0.05476	2.67×10-8	0.1926	26761
		Interaction	-0.006782	0.004072				-0.002013	0.002517				-0.00336	0.002128
rs10506418	FAM19A2
	1		0.11	0.04	0.01	0.1642	13992	0.01	0.04	0.74	0.8263	12032	0.0563	0.0289	0.0511	0.2993	26024
	2		0.14	0.04	0.0005	0.1925	13982	0.01	0.04	0.73	0.611	12029	0.0639	0.025	0.01057	0.0958	26011
	3	SNP	-0.8	0.25	2.09×10-8	0.1141	13982	-0.51	0.15	0.004	0.2648	12029	-0.6183	0.1284	1.92×10-8	0.006349	26011
		Interaction	0.0353	0.009319				0.01899	0.005918				0.0261	0.00491
rs1857095	ELTD1
	1		0.02	0.05	0.69	0.4817	13991.9	-0.02	0.04	0.57	0.02624	12617	-0.0062	0.0301	0.8383	0.08155	26608.9
	2		0.01	0.04	0.91	0.1956	13982	-0.04	0.03	0.23	0.07865	12614	-0.0236	0.0262	0.3685	0.07824	26596
	3	SNP	0.88	0.25	5.4×10-16	0.06279	13982	-0.17	0.14	0.04	0.00948	12614	0.08322	0.1223	7.91×10-9	7.83×10-10	26596
		Interaction	-0.02888	0.009253				0.003998	0.005518				-2.82×10-4	0.00464
rs11594101	NRG3
	1		0.04	0.05	0.41	0.6074	16753	-0.006	0.05	0.91	0.9089	11151	0.0202	0.0354	0.5695	0.8667	27904
	2		-0.001	0.04	0.98	0.7064	16735	-0.006	0.05	0.9	0.7952	11150	-0.0024	0.0312	0.9376	0.8963	27885
	3	SNP	1.61	0.25	8.38×10-10	0.08749	16735	0.08	0.18	0.83	0.92	11150	0.6177	0.1447	9.46×10-5	0.0008754	27885
		Interaction	-0.05964	0.009282				-0.0035	0.006771				-0.02327	0.005419
rs12583553	FGF9
	1		-0.05	0.04	0.18	0.03768	16753	-0.02	0.04	0.69	0.8071	12462	-0.0376	0.0285	0.1871	0.2211	29215
	2		-0.06	0.03	0.08	0.1018	16735	-0.04	0.04	0.31	0.7378	12460	-0.0507	0.0251	0.04357	0.3524	29195
	3	SNP	1.02	0.19	1.41×10-10	4.39×10-5	16735	0.19	0.16	0.16	0.07416	12460	0.5547	0.121	3.60×10-9	6.92×10-8	29195
		Interaction	-0.04321	0.007323				-0.008746	0.006076				-0.02395	0.004583
rs4548846	CDH13
	1		0.04	0.06	0.46	0.07002	8811.99	-0.03	0.08	0.75	0.3066	9594	0.0154	0.0422	0.715	0.3546	18406
	2		0.04	0.05	0.46	0.224	8810	-0.07	0.07	0.29	0.6322	9591	-0.0017	0.0368	0.9632	0.6486	18401
	3	SNP	1.56	0.28	1.53×10-9	3.90×10-15	8810	-0.43	0.29	0.05	0.1868	9591	0.5921	0.1804	1.12×10-5	1.21×10-16	18401
		Interaction	-0.0616	0.01019				0.0127	0.01174				-0.02639	0.006871
rs12522198	FAM134B
	1		-0.04	0.05	0.38	0.5648	13190	0.007	0.08	0.93	0.7016	6608	-0.029	0.0412	0.4821	0.7911	19798
	2		-0.04	0.04	0.37	0.614	13982	0.11	0.06	0.09	0.5122	6607	0.0072	0.0355	0.839	0.3831	20589
	3	SNP	1.8	0.28	1.18×10-10	6.13×10-6	13982	-0.41	0.28	0.14	3.37×10-15	6607	0.7872	0.192	1.57×10-4	8.00×10-27	20589
		Interaction	-0.0707	0.01056				0.01782	0.01058				-0.03055	0.007307
rs10483182	ISX
	1		0.06	0.05	0.27	0.2282	13992	0.06	0.08	0.43	0.7566	6417	0.0599	0.044	0.1731	0.5347	20409
	2		0.01	0.05	0.78	0.3106	13982	0.07	0.06	0.29	0.7481	6417	0.0323	0.0378	0.3933	0.5693	20399
	3	SNP	-1.98	0.26	7.32×10-15	1.4×10-5	13982	-0.27	0.26	0.21	0.8701	6417	-1.159	0.1784	7.82×10-12	1.18×10-7	20399
		Interaction	0.07937	0.009978				0.0128	0.01016				0.04803	0.006964
rs10520638	AGBL1
	1		-0.001	0.08	0.99	0.03205	7601	0.12	0.09	0.17	0.7738	4782	0.004	0.045	0.9285	0.09429	12383
	2		-0.004	0.07	0.95	0.02894	7587	0.05	0.07	0.47	0.347	4782	-0.0114	0.0397	0.7737	0.08171	12369
	3	SNP	2.01	0.33	8.27×10-14	1.96×10-6	7587	0.38	0.26	0.22	0.1019	4782	0.894	0.1867	1.21×10-7	6.78×10-13	12369
		Interaction	-0.0802	0.01162				-0.01192	0.009669				-0.03605	0.006859
rs6013915	PFDN4
	1		0.05	0.05	0.35	0.06007	13991.9	0.05	0.05	0.25	3.30×10-4	9130	0.0497	0.0335	0.1376	4.64×10-4	23121.9
	2		0.07	0.04	0.13	0.1542	13982	0.05	0.04	0.23	0.007304	9129	0.0582	0.0301	0.05348	0.014	23111
	3	SNP	-0.96	0.27	6.32×10-8	2.6×10-5	13982	-0.56	0.29	0.04	0.004106	9129	-0.8386	0.1898	1.52×10-9	6.03×10-7	23111
		Interaction	0.04274	0.01027				0.02477	0.0114				0.03705	0.007369
rs9658121	PPARD
	1		0.09	0.07	0.25	0.002613	6142	-0.05	0.05	0.27	0.9742	10843	-0.0097	0.039	0.8032	0.02385	16985
	2		0.13	0.07	0.06	0.00309	6132	-0.03	0.04	0.51	0.9757	10841	0.0167	0.035	0.6325	0.01546	16973
	3	SNP	-0.49	0.33	1.54×10-7	3.06×10-6	6132	-0.33	0.16	0.1	0.9258	10841	-0.3982	0.1452	0.0007276	1.65×10-8	16973
		Interaction	0.02936	0.01221				0.01136	0.006135				0.01747	0.005417
rs10508754	KIAA1462
	1		-0.14	0.03	1.07×10-5	0.3024	12363	0.03	0.02	0.26	0.8313	12787	-0.0334	0.0189	0.07703	0.008851	25150
	2		-0.15	0.03	2.55×10-7	0.09552	12363	0.01	0.02	0.72	0.7177	12783	-0.0459	0.0165	0.005473	0.001251	25146
	3	SNP	0.19	0.22	2.64×10-5	0.1411	12363	0.17	0.1	0.17	0.5505	12783	0.1362	0.09274	0.0713	0.003946	25146
		Interaction	-0.01209	0.00867				-0.005956	0.004014				-0.00624	0.003621
rs11627967	NPAS3
	1		-0.04	0.06	0.53	0.09813	8811.98	0.02	0.09	0.79	0.6032	8784	-0.0199	0.0492	0.6868	0.3068	17596
	2		-0.04	0.05	0.46	0.08223	8810	-0.02	0.07	0.79	0.5714	8783	-0.0322	0.0417	0.4403	0.2863	17593
	3	SNP	-1.46	0.28	1.01×10-9	1.42×10-13	8810	-0.1	0.32	0.95	0.3792	8783	-0.9436	0.209	1.55×10-7	3.90×10-15	17593
		Interaction	0.06077	0.01071				0.003456	0.01251				0.0396	0.007947
rs10495667	VSNL1
	1		0.09	0.04	0.01	0.4966	13991.9	-0.01	0.03	0.73	0.7406	13354	0.023	0.0233	0.3232	0.3665	27345.9
	2		0.09	0.03	0.008	0.7128	13982	-0.03	0.03	0.34	0.9667	13350	0.0083	0.0208	0.6888	0.3195	27332
	3	SNP	-0.9	0.18	3.83×10-9	0.1164	13982	-0.13	0.17	0.51	0.2078	13350	-0.5055	0.1182	3.76×10-5	1.58×10-4	27332
		Interaction	0.03824	0.006955				0.004389	0.006606				0.02042	0.01
rs13059110	TXNDC6
	1		-0.1	0.02	1.6×10-6	0.1786	13984	-0.01	0.02	0.52	0.1291	12441	-0.0531	0.0137	1.10×10-4	0.007982	26425
	2		-0.09	0.02	3.69×10-7	0.1181	13982	-0.005	0.02	0.77	0.6457	12438	-0.0443	0.012	2.26×10-4	0.009527	26420
	3	SNP	0.2	0.14	8.84×10-5	0.08162	13982	-0.04	0.09	0.79	0.05505	12438	0.02727	0.07345	0.012	0.001682	26420
		Interaction	-0.01041	0.005417				0.00141	0.003378				-0.002305	0.002843
rs11790816	SH3GL2
	1		0.03	0.06	0.59	0.05582	9364.92	-0.01	0.04	0.84	0.3905	12469	0.0144	0.0298	0.6297	0.1499	21833.9
	2		0.03	0.05	0.52	0.1493	9347	0.005	0.04	0.89	0.9047	12467	0.0202	0.0267	0.4489	0.6265	21814
	3	SNP	-1.38	0.26	3.56×10-9	2.06×10-4	9347	0.13	0.17	0.45	0.4174	12467	-0.3739	0.1364	0.0005199	2.72×10-7	21814
		Interaction	0.05783	0.01006				-0.003789	0.006554				0.01647	0.005219
Model 1 is adjusted for age and sex; Model 2 is adjusted for age, sex, and BMI; Model 3 assesses the combined influence of the SNP effect adjusted for BMI and the interaction effect between the genotype and BMI on ISI. For Model 1 and Model 2, the effect, SE, and P-values for the SNP are shown. For Model 3, the effect (beta) and SE are provided for the SNP and the interaction; P-value is provided…
