# Supplementary material for: Genome-Wide Association Study of the Modified Stumvoll Insulin Sensitivity Index Identifies BCL2 and FAM19A2 as Novel Insulin Sensitivity Loci
Source: Oxford University Press journal article supplement (doi:10.2337/db16-0199), 2016-07-14
Supplement: db160199supplementarydata5.xlsx [file db160199supplementarydata5.xlsx]

## Sheet: Supplemental Table 4
Supplementary Table 4. Results of Meta-Analysis for Variant Association with Insulin Sensitivity Index Using Minor Allele Count Filter
SNP	Locus		Combined Meta-Analysis using MAC < 20 filter in Discovery Cohorts					Combined Meta-Analysis using MAF <1% filter in Discovery Cohorts (repeated from Table 2 and Supplemental Table 3)
Model			Effect (Beta)	SE	P-value	Het P-value	N	Effect (Beta)	SE	P-value	Het P-value	N
rs13422522	NYAP2
	1		-0.043	0.01	1.64×10-5	0.1361	30078.3	-0.043	0.01	1.64×10-5	0.1361	30078.3
	2		-0.0593	0.0087	1.20×10-11	0.2619	30056.3	-0.0593	0.0087	1.20×10-11	0.2619	30057
	3	SNP	0.09666	0.05674	8.87×10-11	0.2866	30056.3	0.09666	0.05674	8.87×10-11	0.2866	30057
		Interaction	-0.005674	0.002195				-0.005674	0.002195
rs4078023	GP2
	1		-0.0187	0.0406	0.6454	0.3375	21844	-0.0277	0.0403	0.4924	0.1834	24742
	2		-0.0368	0.0355	0.2995	0.08022	21829	-0.0457	0.0353	0.195	0.02507	24727
	3	SNP	0.4579	0.1846	0.02511	0.05334	21829	0.7983	0.1663	3.17×10-7	4.23×10-5	24727
		Interaction	-0.01872	0.007139				-0.03292	0.006358
rs12372926	ARRDC4
	1		-0.0278	0.0085	0.001071	0.002499	30095	-0.0278	0.0085	0.001071	0.002499	30095
	2		-0.0322	0.0075	1.61×10-5	4.35×10-4	30073	-0.0322	0.0075	1.16×10-5	4.35×10-4	30073
	3	SNP	0.1054	0.04811	4.20×10-4	5.59×10-4	30073	0.1054	0.04811	4.20×10-4	0.0005589	30073
		Interaction	-0.004902	0.001868				-0.004902	0.001868
rs16924527	TOX
	1		0.1153	0.0359	0.001316	8.10×10-7	25005	0.1187	0.036	0.0009791	2.57×10-7	25005
	2		0.0714	0.0316	0.02386	0.1306	24993	0.0738	0.0317	0.0198	0.05023	24994
	3	SNP	0.1788	0.1432	0.005466	9.95×10-7	24993	-0.08207	0.1351	3.72×10-6	2.29×10-15	24994
		Interaction	-0.00384	0.005524				0.007825	0.005162
rs2828537	MRPL39
	1		-0.038	0.0253	0.1323	0.09899	29291.9	-0.0395	0.0252	0.1166	0.1221	29753.9
	2		-0.031	0.0225	0.1682	0.2296	29270.9	-0.0318	0.0224	0.1569	0.283	29733
	3	SNP	0.4141	0.1029	3.56×10-5	1.45×10-4	29270.9	0.4182	0.1024	2.60×10-5	3.19×10-4	29733
		Interaction	-0.0172	0.00395				-0.01738	0.003935
rs3900087	ADAMTS3
	1		-0.0435	0.0451	0.3343	0.4238	21557	-0.0435	0.0451	0.3343	0.4238	22351
	2		-0.0389	0.038	0.3056	0.5187	22350	-0.0389	0.038	0.3056	0.5187	22350
	3	SNP	0.737	0.209	4.66×10-4	1.75×10-5	21557	0.737	0.209	4.66×10-4	1.75×10-5	22350
		Interaction	-0.03016	0.008032				-0.03016	0.008032
rs6027072	ARHGAP40
	1		0.0973	0.0249	9.43×10-5	0.4115	28896	0.0973	0.0249	9.43×10-5	0.4115	28896
	2		0.078	0.022	4.05×10-4	0.1787	28877	0.078	0.022	4.05×10-4	0.1787	28877
	3	SNP	-0.3888	0.1194	4.36×10-9	0.02424	28877	-0.3888	0.1194	4.36×10-9	0.02424	28877
		Interaction	0.0184	0.004557				0.0184	0.004557
rs12454712	BCL2
	1		-0.0356	0.0098	2.80×10-4	0.6402	25973	-0.0356	0.0098	2.80×10-4	0.6402	25973
	2		-0.0478	0.0085	1.87×10-8	0.2083	25961	-0.0478	0.0085	1.87×10-8	0.2083	26761
	3	SNP	0.04353	0.05476	2.67×10-8	0.1926	25961	0.04353	0.05476	2.67×10-8	0.1926	26761
		Interaction	-0.00336	0.002128				-0.00336	0.002128
rs10506418	FAM19A2
	1		0.0495	0.0291	0.08894	0.535	25562	0.0563	0.0289	0.0511	0.2993	26024
	2		0.0584	0.0251	0.02028	0.1961	25549	0.0639	0.025	0.01057	0.0958	26011
	3	SNP	-0.5801	0.1299	7.96×10-7	0.07127	25549	-0.6183	0.1284	1.92×10-8	0.006349	26011
		Interaction	0.0242	0.004975				0.0261	0.00491
rs1857095	ELTD1
	1		-0.0062	0.0302	0.8364	0.05596	26146.9	-0.0062	0.0301	0.8383	0.08155	26608.9
	2		-0.0239	0.0263	0.3625	0.05434	26133.9	-0.0236	0.0262	0.3685	0.07824	26596
	3	SNP	0.08679	0.1223	0.0877	0.001026	26133.9	0.08322	0.1223	7.91×10-9	7.83×10-10	26596
		Interaction	-0.005046	0.004697				-2.82×10-4	0.00464
rs11594101	NRG3
	1		0.0202	0.0354	0.5695	0.8667	27904	0.0202	0.0354	0.5695	0.8667	27904
	2		-0.0024	0.0312	0.9376	0.8963	27885	-0.0024	0.0312	0.9376	0.8963	27885
	3	SNP	0.6177	0.1447	9.46×10-5	0.0008754	27885	0.6177	0.1447	9.46×10-5	0.0008754	27885
		Interaction	-0.02327	0.005419				-0.02327	0.005419
rs12583553	FGF9
	1		-0.0394	0.0288	0.1712	0.6918	27951	-0.0376	0.0285	0.1871	0.2211	29215
	2		-0.0529	0.0254	0.03693	0.7559	27933	-0.0507	0.0251	0.04357	0.3524	29195
	3	SNP	0.2078	0.1328	0.009001	0.176	27933	0.5547	0.121	3.60×10-9	6.92×10-8	29195
		Interaction	-0.009929	0.005059				-0.02395	0.004583
rs4548846	CDH13
	1		0.0205	0.0423	0.6288	0.4945	23124	0.0154	0.0422	0.715	0.3546	18406
	2		0.0018	0.0369	0.9602	0.7542	23111	-0.0017	0.0368	0.9632	0.6486	18401
	3	SNP	-0.4543	0.2087	0.08475	0.2046	23111	0.5921	0.1804	1.12×10-5	1.21×10-16	18401
		Interaction	0.01689	0.008115				-0.02639	0.006871
rs12522198	FAM134B
	1		-0.0266	0.0414	0.5207	0.742	19336	-0.029	0.0412	0.4821	0.7911	19798
	2		0.0088	0.0356	0.8048	0.318	20127	0.0072	0.0355	0.839	0.3831	20589
	3	SNP	0.7878	0.1924	1.66×10-4	9.26×10-28	19336	0.7872	0.192	1.57×10-4	8.00×10-27	20589
		Interaction	-0.03054	0.007324				-0.03055	0.007307
rs10483182	ISX
	1		0.0622	0.0443	0.16	0.4597	19947	0.0599	0.044	0.1731	0.5347	20409
	2		0.0324	0.038	0.3947	0.4739	19937	0.0323	0.0378	0.3933	0.5693	20399
	3	SNP	-0.4076	0.2102	0.07458	0.4421	19937	-1.159	0.1784	7.82×10-12	1.18×10-7	20399
		Interaction	0.01741	0.008338				0.04803	0.006964
rs10520638	AGBL1
	1		0.0124	0.0453	0.7848	0.1348	19309	0.004	0.045	0.9285	0.09429	12383
	2		-0.006	0.04	0.8804	0.08306	19295	-0.0114	0.0397	0.7737	0.08171	12369
	3	SNP	0.1545	0.2082	0.756	0.02614	19295	0.894	0.1867	1.21×10-7	6.78×10-13	12369
		Interaction	-0.005837	0.007813				-0.03605	0.006859
rs6013915	PFDN4
	1		0.0452	0.0336	0.1788	0.0006142	22659.9	0.0497	0.0335	0.1376	4.64×10-4	23121.9
	2		0.0541	0.0302	0.07362	0.02065	22648.9	0.0582	0.0301	0.05348	0.014	23111
	3	SNP	-0.2598	0.2156	0.02852	0.01928	22648.9	-0.8386	0.1898	1.52×10-9	6.03×10-7	23111
		Interaction	0.01278	0.00851				0.03705	0.007369
rs9658121	PPARD
	1		-0.0097	0.039	0.8032	0.02385	16985	-0.0097	0.039	0.8032	0.02385	16985
	2		0.0167	0.035	0.6325	0.01546	16973	0.0167	0.035	0.6325	0.01546	16973
	3	SNP	-0.3982	0.1452	0.0007276	1.65×10-8	16973	-0.3982	0.1452	0.0007276	1.65×10-8	16973
		Interaction	0.01747	0.005417				0.01747	0.005417
rs10508754	KIAA1462
	1		-0.0334	0.0189	0.07703	0.008851	24359	-0.0334	0.0189	0.07703	0.008851	25150
	2		-0.0459	0.0165	0.005473	0.001251	24345	-0.0459	0.0165	0.005473	0.001251	25146
	3	SNP	0.1362	0.09274	0.0713	0.003946	24345	0.1362	0.09274	0.0713	0.003946	25146
		Interaction	-0.00624	0.003621				-0.00624	0.003621
rs11627967	NPAS3
	1		-0.0307	0.0495	0.5357	0.7015	17134	-0.0199	0.0492	0.6868	0.3068	17596
	2		-0.0411	0.0419	0.3268	0.756	17131	-0.0322	0.0417	0.4403	0.2863	17593
	3	SNP	0.2951	0.2585	0.5198	0.2787	17131	-0.9436	0.209	1.55×10-7	3.90×10-15	17593
		Interaction	-0.01147	0.01005				0.0396	0.007947
rs10495667	VSNL1
	1		0.023	0.0233	0.3232	0.3665	30106.9	0.023	0.0233	0.3232	0.3665	27345.9
	2		0.0083	0.0208	0.6888	0.3195	30084.9	0.0083	0.0208	0.6888	0.3195	27332
	3	SNP	-0.5055	0.1182	3.76×10-5	1.58×10-4	30084.9	-0.5055	0.1182	3.76×10-5	1.58×10-4	27332
		Interaction	0.02042	0.00459				0.02042	0.01
rs13059110	TXNDC6
	1		-0.0531	0.0137	1.10×10-4	0.007982	26425	-0.0531	0.0137	1.10×10-4	0.007982	26425
	2		-0.0443	0.012	2.26×10-4	0.009527	26412	-0.0443	0.012	2.26×10-4	0.009527	26420
	3	SNP	0.02727	0.07345	0.012	0.001682	26412	0.02727	0.07345	0.012	0.001682	26420
		Interaction	-0.002305	0.002843				-0.002305	0.002843
rs11790816	SH3GL2
	1		0.0076	0.03	0.8011	0.3291	28759.9	0.0144	0.0298	0.6297	0.1499	21833.9
	2		0.015	0.0268	0.5751	0.8387	28739.9	0.0202	0.0267	0.4489	0.6265	21814
	3	SNP	-0.06372	0.1462	0.4355	0.2141	28739.9	-0.3739	0.1364	0.0005199	2.72×10-7	21814
		Interaction	0.003485	0.00562				0.01647	0.005219
In a sensitivity analysis, the combined meta-analyses were repeating removing all SNPs with a minor allele count (MAC) < 20 in the discovery and replication cohorts. As compared to when a minor allele frequency (MAF) < 1% was applied to the discovery cohorts and MAC < 20 was applied to replication cohorts in the combined meta-analysis (as shown in Table 2 and Supplemental Table 3 and repeated her…
