# Supplementary material for: Genome-Wide Association Study of the Modified Stumvoll Insulin Sensitivity Index Identifies BCL2 and FAM19A2 as Novel Insulin Sensitivity Loci
Source: Oxford University Press journal article supplement (doi:10.2337/db16-0199), 2016-07-14
Supplement: db160199supplementarydata6.xlsx [file db160199supplementarydata6.xlsx]

## Sheet: Supplemental Table 5
Supplementary Table 5. In silico findings for rs12454712 (BCL2) and rs10506418 (FAM19A2)
rs12454712 (BCL2)
Conditioning results at rs12454712 (BCL2) on the signal from the obesity locus rs663129 (MC4R), located 3 Mb away (LD r2 < 0.0001), did not attenuate the association with the ISI in the discovery cohorts of Model 2 (beta = -0.067 ± 0.01, P= 1.4 × 10-7 to beta = -0.067 ± 0.01, P=1.6 × 10-7), and no other genome-wide significant findings for glycemic traits are present on chromosome 18.
The major (T) allele of rs12454712 (BCL2) was also associated with a trend toward reduced insulin sensitivity as measured by M value from direct measures of insulin sensitivity in the GENESIS consortium (beta = -0.0275 ± 0.03, P=0.41, N=2,764). When the variant at BCL2 was tested in the same subset of discovery cohorts (FHS, Sorbs, FUSION), the associations with fasting insulin and ISI were not s…
In silico analyses suggest rs12454712 lies within the intron of BCL2 and may affect transcription factor binding (RegulomeDB score 2b = TF binding + any motif + DNAse footprint + DNAse peak). Using the UCSC Genome Browser, binding motifs to several transcription factors are evident (MYC, RUNX3, EBF1, and FOXP2).
While rs12454712 is not LD with any SNP within 500kb, BCL2 is contiguous to PHLPP1, encoding a phosphatase that mediates dephosphorylation of AKT1, AKT2, and AKT3, which has a role in regulation of apopotosis and insulin signaling (www.Uniprot.org). Thus, this locus may play a role in altering insulin signaling through apoptosis
rs10506418 (FAM19A2)
Conditioning the result at rs10506418 (FAM19A2, chromosome 12) on signals from known glucose and insulin loci within 100 Mb did not attenuate the association with the ISI in the discovery cohorts of Model 2 (beta = 0.139 ± 0.04, P= 4.50 × 10-4 (unconditioned) to beta = 0.139 ± 0.04, P= 4.57 × 10-4 when conditioned on rs35767 (IGF1, LD r2 = 0.0005), to beta = 0.139 ± 0.04, P= 4.54 × 10-4 when cond…
When rs10506418 was tested in the same subset of discovery cohorts (FHS, Sorbs, FUSION), the associations with fasting insulin and ISI were not significant (for fasting insulin SNP effect = 0.33 ± 0.13, interaction effect -0.01 ± 0.13, P=0.06, N=7,851 and for ISI SNP effect = -0.17 ± 0.48, interaction effect -0.01 ± 0.01, P=0.85, N=3,396). However, for the fasting insulin and ISI analyses, the di…
FAM19A2 belongs to a family of genes that encode small secreted proteins related to chemokines, acting as regulators of immune and nervous cells primarily in the brain.
Multiple SNPs within 1 Mb (e.g., rs17125631) are associated at nominal significance with type 2 diabetes and fasting insulin, although these are not in LD with our finding at rs10506418. The genomic region containing FAM19A2 also contains USP15, a hydrolase that removes ubiquitin from target proteins and regulates several pathways, including TGF-beta receptor signaling and NF-kappa-B pathways.
