# Supplementary material for: Genome-Wide Association Study of the Modified Stumvoll Insulin Sensitivity Index Identifies BCL2 and FAM19A2 as Novel Insulin Sensitivity Loci
Source: Oxford University Press journal article supplement (doi:10.2337/db16-0199), 2016-07-14
Supplement: db160199supplementarydata7.xlsx [file db160199supplementarydata7.xlsx]

## Sheet: Supplemental Table 6
Supplementary Table 6: Association for rs12454712 (BCL2) and rs10506418 (FAM19A2) with ISI and fasting insulin at different strata of body mass index
			rs12454712				rs10506418
	ISI		Fasting Insulin		ISI		Fasting Insulin
BMI (kg/m2)	Full Cohort	FHS, Sorbs, FUSION	Manning et al	FHS, Sorbs, FUSION	Full Cohort	FHS, Sorbs, FUSION	Manning et al	FHS, Sorbs, FUSION
< 20	-0.02367	-0.05267	0.013212	-0.0253	-0.0963	-0.0188	0.01414	0.0974
20-24.9	-0.04047	-0.058345	0.01794	-0.003025	0.0342	0.0181	0.000675	0.04475
25-29.9	-0.05727	-0.06402	0.022668	0.01925	0.1647	0.055	-0.01279	-0.0079
30-34.9	-0.07407	-0.069695	0.027396	0.041525	0.2952	0.0919	-0.026255	-0.06055
≥35	-0.09087	-0.07537	0.032124	0.0638	0.4257	0.1288	-0.03972	-0.1132
The association of the T allele rs12454712 (BCL2) and the A allele rs10506418 (FAM19A2) with ISI and fasting insulin is shown at different strata of body mass index (BMI). The effect (beta) is derived from the Model 3 analyses in the full cohort of the current study for ISI (the same data in Figure 2 and Figure 3) and from a published dataset for fasting insulin (Nat Genet 2012; 44:659-669). To c…
